# Supplementary material
Source: Springer Nature journal article supplement (http://www.springermedizin.de/resource/supplementary/13054_2013_2085_MOESM1_ESM.pdf/9711924)

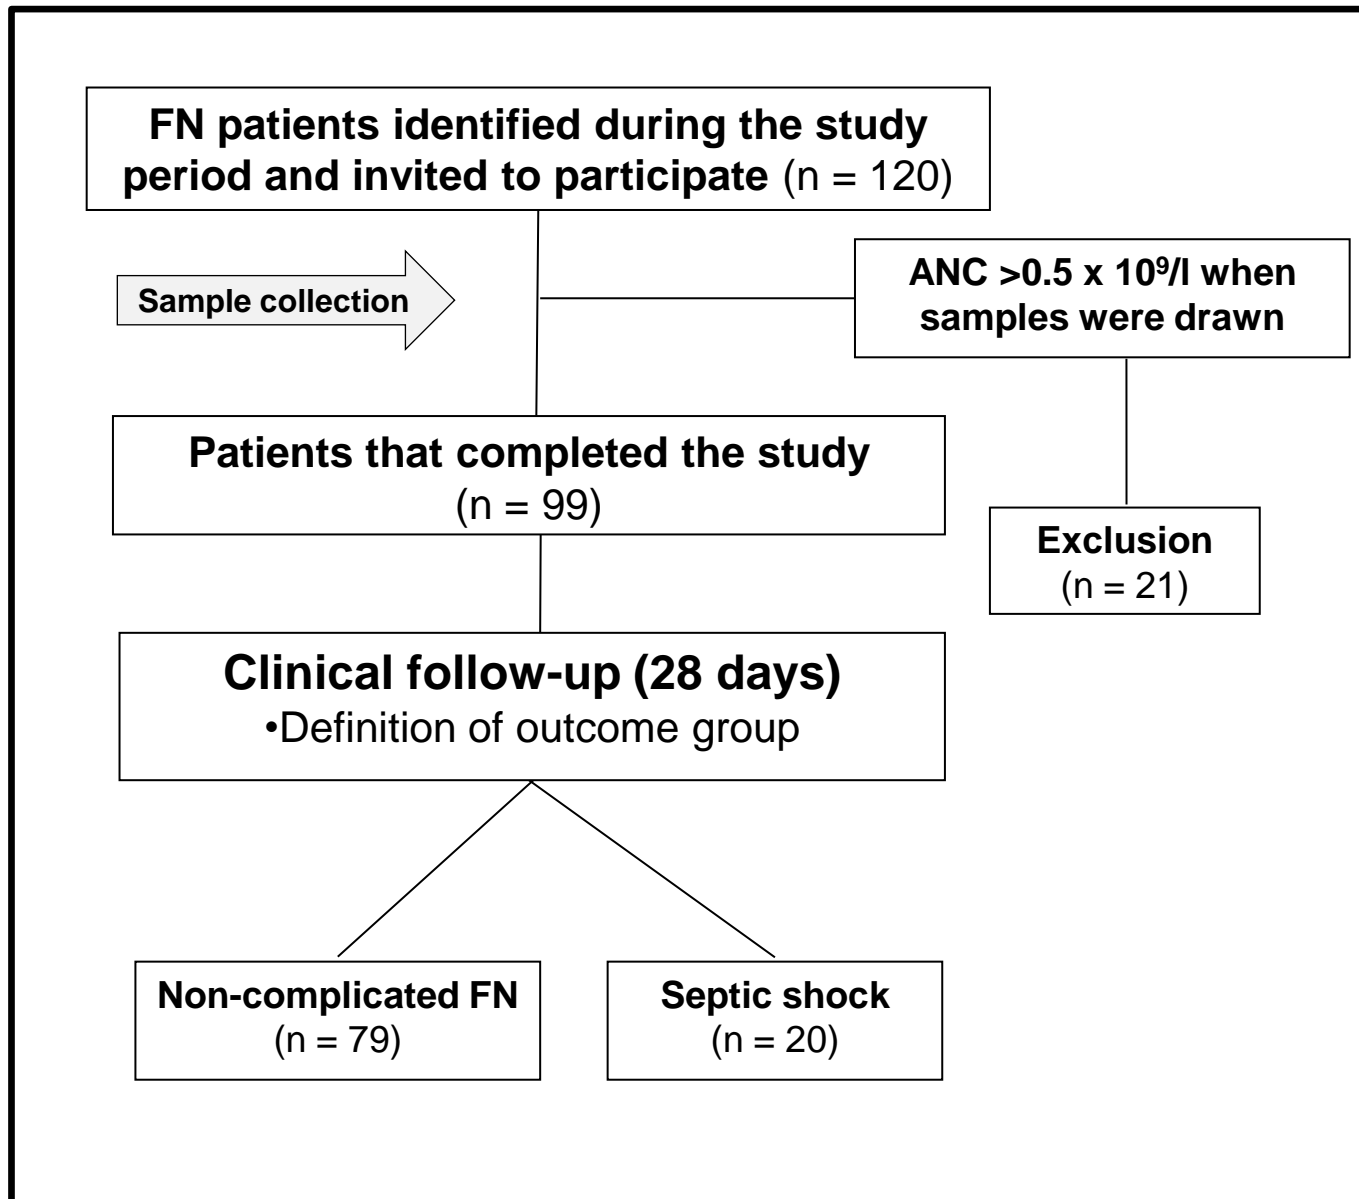

Supplement: MOESM1 [file 9711924]
